# Supplementary material
Source: Springer Nature journal article supplement (https://www.springermedizin.de/resource/supplementary/12946_2011_144_MOESM7_ESM.pdf/9555258)

A.

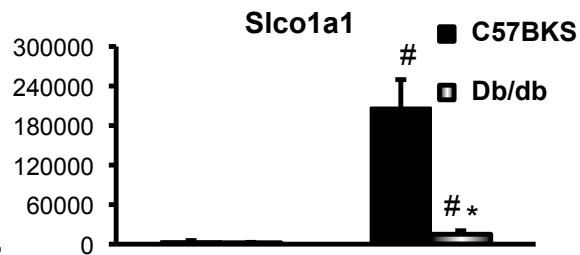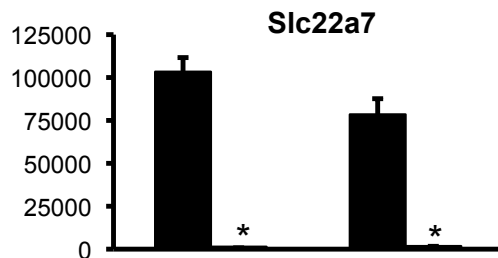Average RLU/10 $\mu$ g Total RNA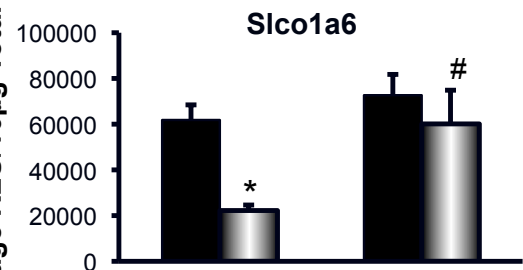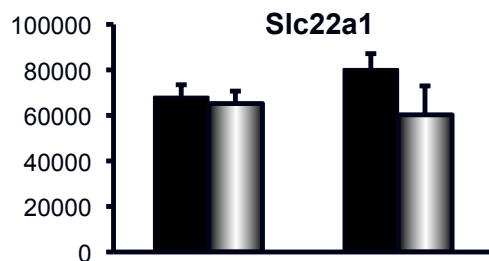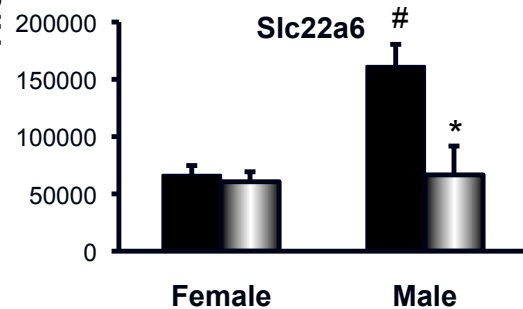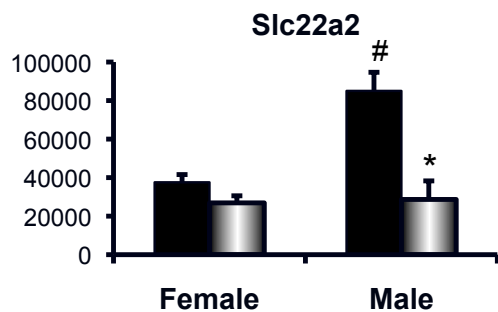

B.

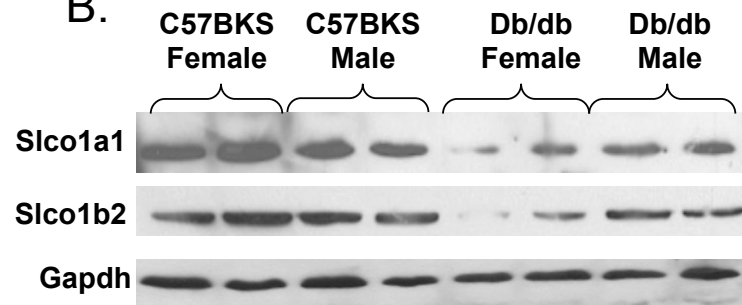

C.

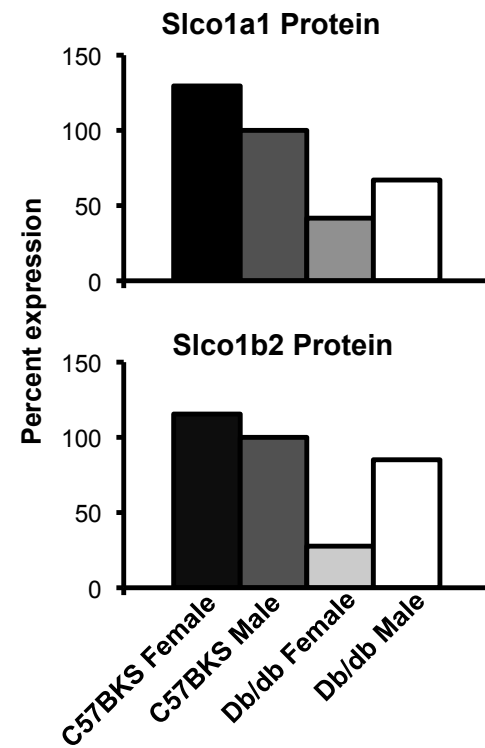

Supplement: MOESM7 [file 9555258]
